# Supplementary material
Source: MDPI journal article supplement (https://www.mdpi.com/2073-4441/12/11/3147)
Supplement: s1 [file s1]

# Supplementary Data

## of

# Adsorptive Removal of Arsenic by Mesoporous Iron Oxide in Aquatic System

**Table S1.** Related parameters for the adsorption of As(III) and As(V) on MI.

| Arsenic | Freundlich |        |        |          | Langmuir        |                 |        |          |
|---------|------------|--------|--------|----------|-----------------|-----------------|--------|----------|
|         | $K_F$      | $1/n$  | $R^2$  | $\chi^2$ | $K_L$<br>(L/mg) | $q_m$<br>(mg/g) | $R^2$  | $\chi^2$ |
| As(III) | 35.38      | 0.6415 | 0.9787 | 2.2090   | 0.36            | 136.8885        | 0.9483 | 7.3913   |
| As(V)   | 25.69      | 0.1442 | 0.8725 | 0.8990   | 7.55            | 31.8196         | 0.9336 | 0.5030   |

Experiment condition: 0.075 g/L of MI into 1–9 mg/L of As(III) and As(V) solution at pH7, 25°C and 200rpm.

**Table S2.** Thermodynamic parameter for adsorption of As(III) and As(V) on MI at different temperatures. (Langmuir and Freundlich isotherm).

| Temp (K)             |     | $\ln K$<br>(Constants) | $\Delta G$<br>(kJ/mol) | $\Delta S$<br>(kJ/K · mol) | $\Delta H$<br>(kJ/mol) |
|----------------------|-----|------------------------|------------------------|----------------------------|------------------------|
| As(III) <sup>a</sup> | 278 | 3.486341               | -4.05805               | 4.9334                     | 1.6959                 |
|                      | 298 | 3.566130               | -4.44955               |                            |                        |
|                      | 318 | 3.670438               | -4.88706               |                            |                        |
| As(V) <sup>b</sup>   | 278 | 1.387394               | -1.61491               | 5.2754                     | 4.3891                 |
|                      | 298 | 2.022157               | -2.52310               |                            |                        |
|                      | 318 | 1.844241               | -2.45554               |                            |                        |

a : Freundlich constants b : Langmuir constants.

Experiment condition: 0.075 g/L of MI into 1–9 mg/L of As(III) and As(V) solution at pH 7, 200rpm.

**Table S3.** Intraparticle diffusion rate constants for adsorption of As(III) and As(V) on MI at different MI dosage.

| MI (g/L)                         | As(III) |        |        | As(V)  |        |        |
|----------------------------------|---------|--------|--------|--------|--------|--------|
|                                  | 0.05    | 0.075  | 0.1    | 0.05   | 0.075  | 0.1    |
| $R^2$                            | 0.9616  | 0.9481 | 0.9726 | 0.9412 | 0.9834 | 0.9332 |
| $k_d$ (mg/g min <sup>1/2</sup> ) | 1.2445  | 1.1671 | 0.8414 | 1.8419 | 1.1939 | 1.2527 |

Experiment condition: 1mg/L As(III) and As(V) solutions in 0.01M NaCl, at pH7, 25°C and 200rpm

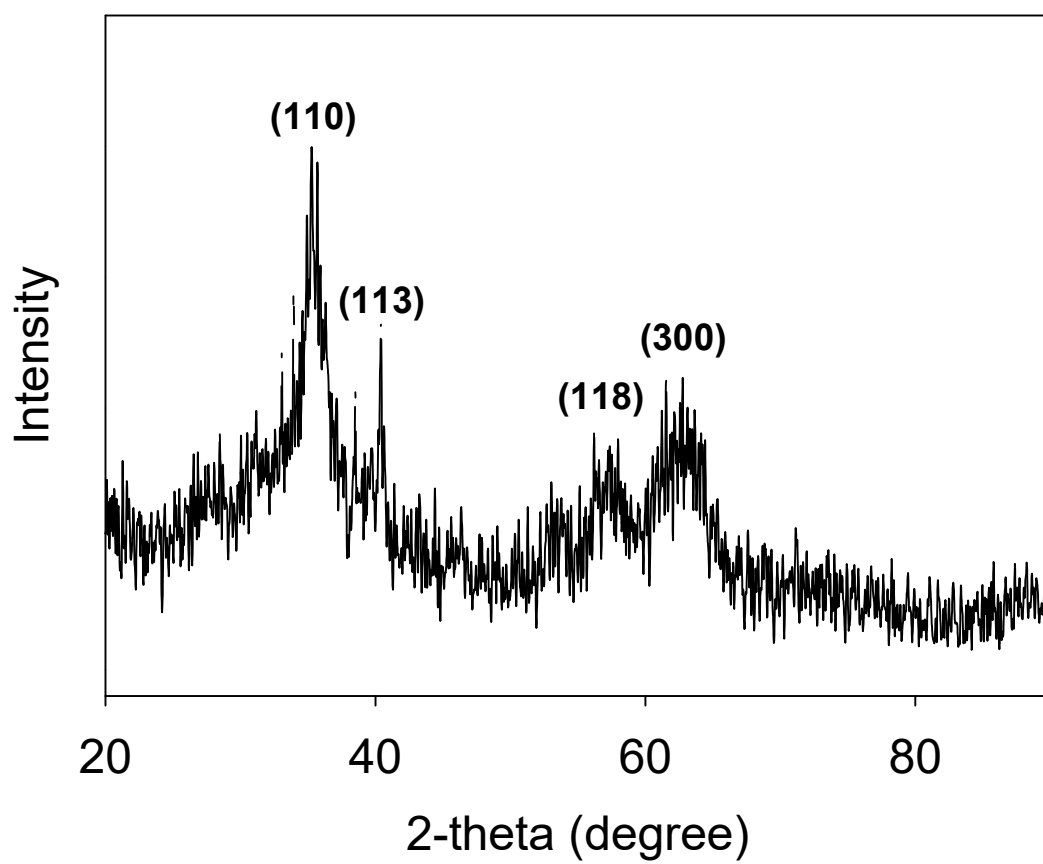

**Figure S1.** Wide-angle X-ray diffraction patterns of MI ( $\alpha$ -Fe<sub>2</sub>O<sub>3</sub>). (Reference: JCPDS file, No. 33-0664).

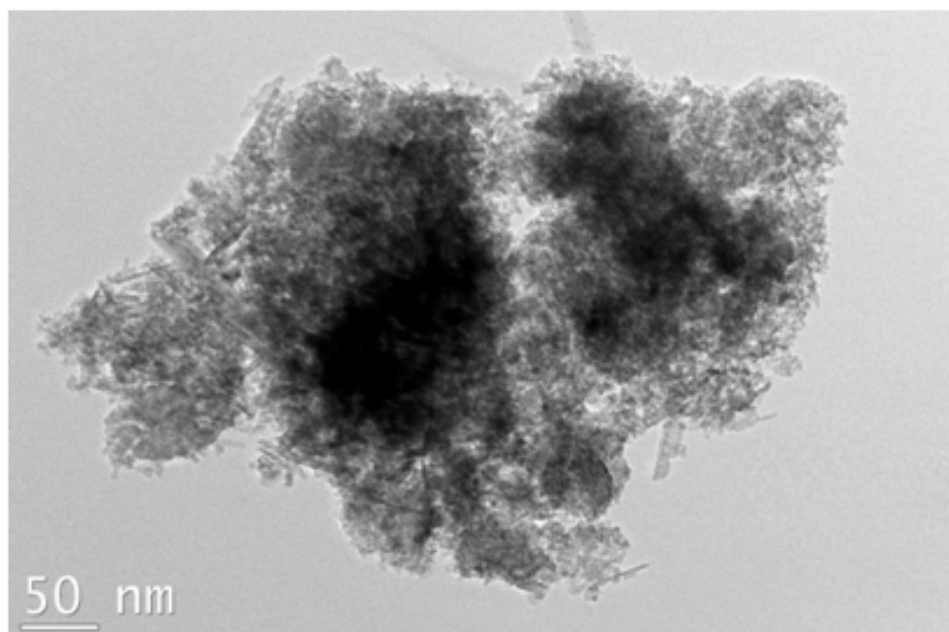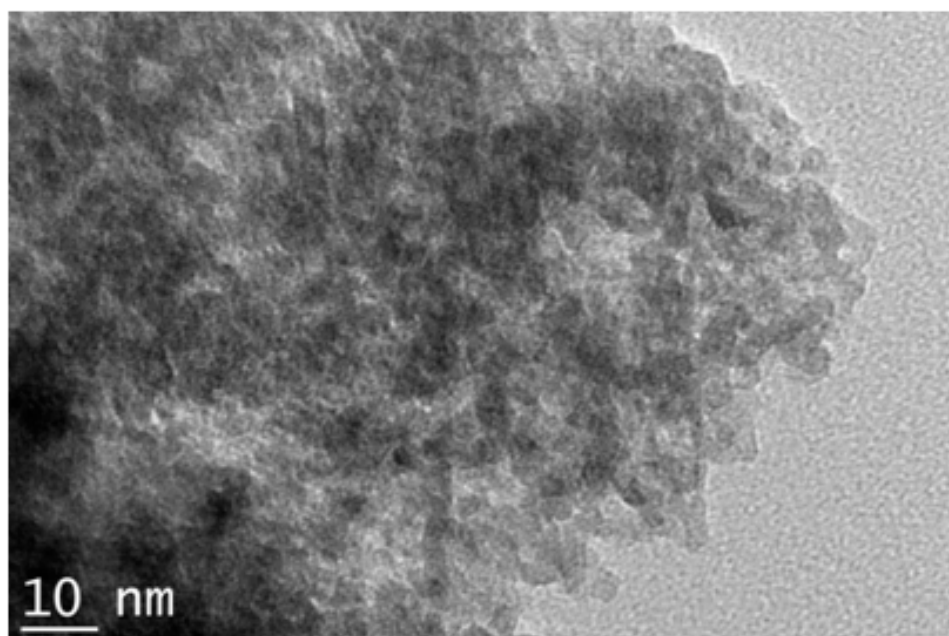

**Figure S2.** Transmission electron microscope images of MI.

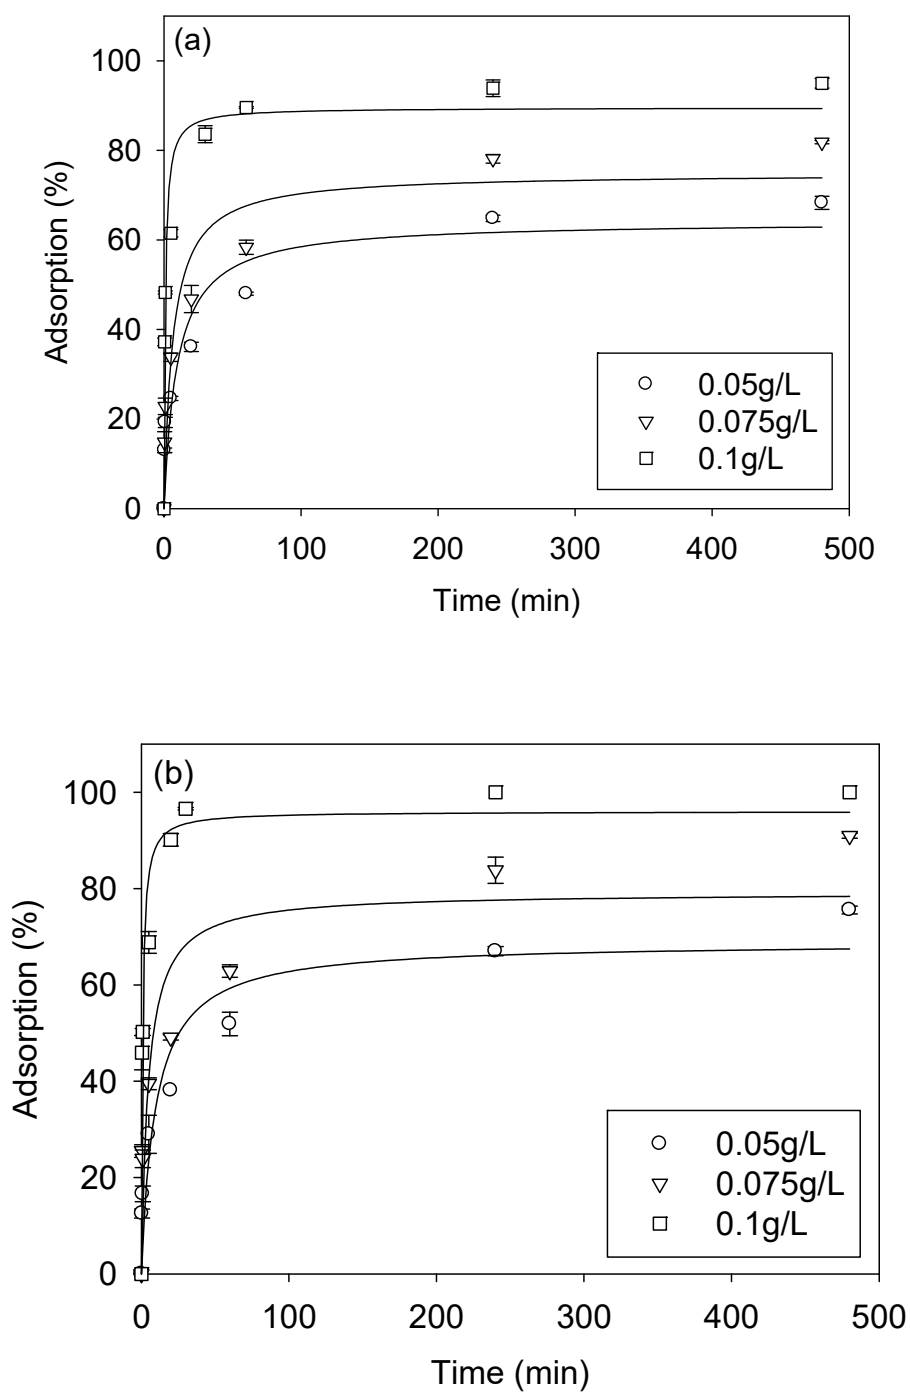

**Figure S3.** Adsorption kinetics of As(III) (a) and As(V) (b) based on pseudo second model with various MI concentrations. The experiments were initiated by adding 0.05, 0.075 and 0.1 g/L of MI into solution containing 1 mg/L of As(III) and As(V) at pH 7.

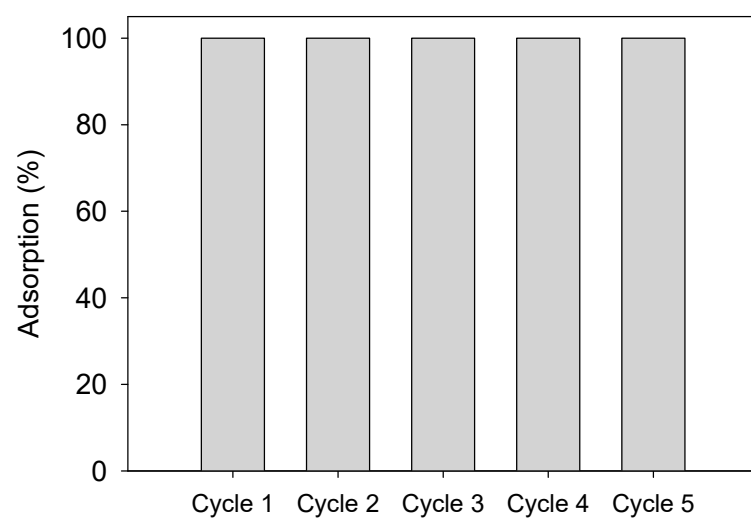

**Figure S4.** Regeneration cycle of As(V) adsorbed MI. The experiments were initiated by adding 0.2 g/L of MI and 3mg/L As(V) was added at the beginning of each cycle.
